# Supplementary material for: Virus-induced type I IFN stimulates generation of immunoproteasomes at the site of infection
Source: JCI journal article supplement (doi:10.1172/jci29832), 2006-10-13
Supplement: sd1 [file 1]

# Supplementary Fig. 1

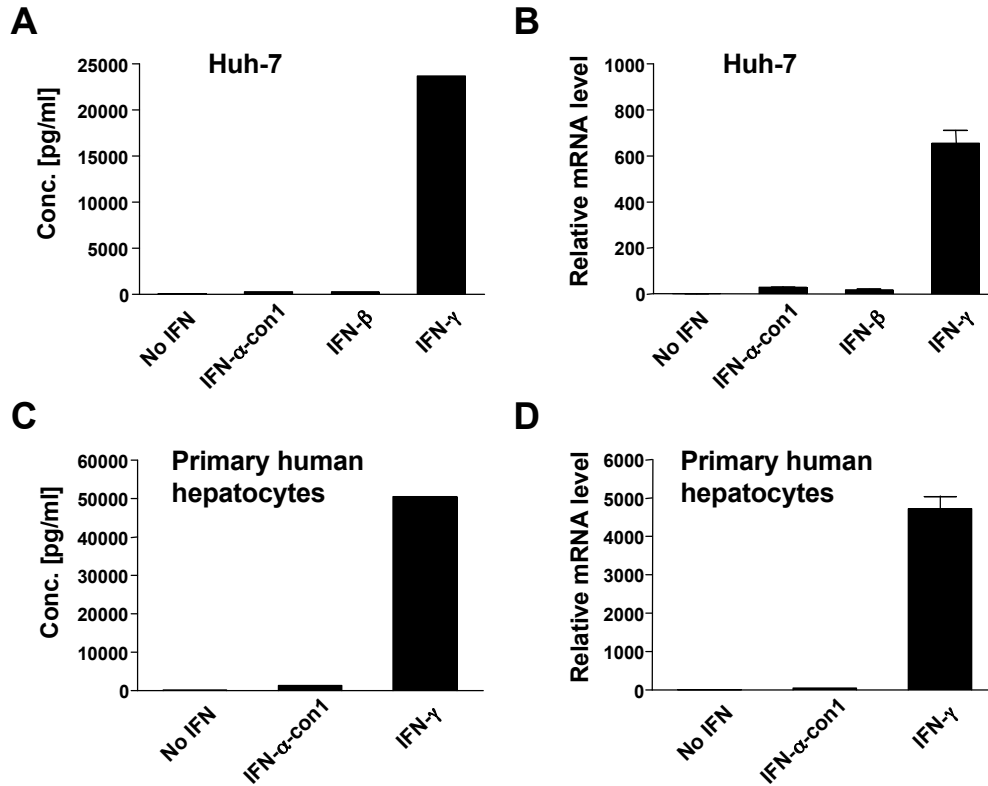

**Supplementary Figure 1: Induction of CXCL9 is IFN- $\gamma$ -dependent.**

Huh-7 cells (A, B) or primary human hepatocytes (C, D) were treated with 3 ng/ml IFN- $\alpha$ -con1, IFN- $\beta$ , or IFN- $\gamma$  for 24 hours. Secreted CXCL9 was quantified by ELISA (A, C) and CXCL9 mRNA levels were quantified by real-time PCR (B, D). CXCL9 was induced by IFN- $\gamma$ , but not by type I IFN.
